# Supplementary material
Source: publisher figshare collection journal article supplement (https://sage.figshare.com/ndownloader/files/17905187)
Supplement: Supplementary file 1 [file 17905187]

# Appendix 1. Characteristics of study population between non-cancer and cancer patients by age group

|                                    | All Adults Age ≥ 18 years |            |                       | Age 18-64 years |            |                       | Age ≥ 65 years |            |                       |
|------------------------------------|---------------------------|------------|-----------------------|-----------------|------------|-----------------------|----------------|------------|-----------------------|
|                                    | No cancer                 | Any cancer |                       | No cancer       | Any cancer |                       | No cancer      | Any cancer |                       |
| n= sample size                     | 114,683                   | 6,799      |                       | 98,722          | 3,269      |                       | 15,961         | 3,530      |                       |
| N= population size                 | 219,658,988               | 17,244,586 | <i>P</i> <sup>a</sup> | 185,586,261     | 7,869,226  | <i>P</i> <sup>a</sup> | 34,072,727     | 9,375,340  | <i>P</i> <sup>a</sup> |
| Age                                |                           |            |                       |                 |            |                       |                |            |                       |
| Total (mean)                       | 45.5                      | 64.2       | < .001                | 40.3            | 51.5       | < .001                | 73.9           | 74.9       | < .001                |
| 18-39 (%)                          | 41.2                      | 6.3        | < .001                | 48.7            | 13.9       | < .001                |                |            |                       |
| 40-64 (%)                          | 43.3                      | 39.3       |                       | 51.3            | 86.1       |                       |                |            |                       |
| 65+ (%)                            | 15.5                      | 54.4       |                       |                 |            |                       | 100.0          | 100.0      |                       |
| Sex (%)                            |                           |            | < .001                |                 |            | < .001                |                |            | < .001                |
| Men                                | 48.4                      | 46.1       |                       | 49.6            | 39.0       |                       | 42.1           | 52.1       |                       |
| Women                              | 51.6                      | 53.9       |                       | 50.4            | 61.0       |                       | 57.9           | 47.9       |                       |
| Race/ethnicity (%)                 |                           |            | < .001                |                 |            | < .001                |                |            | < .001                |
| White, non-Hispanic                | 64.4                      | 85.7       |                       | 62.4            | 81.7       |                       | 75.2           | 89.1       |                       |
| Black, non-Hispanic                | 12.0                      | 6.1        |                       | 12.4            | 7.4        |                       | 9.7            | 5.1        |                       |
| Hispanic                           | 15.7                      | 5.2        |                       | 17.0            | 7.4        |                       | 8.6            | 3.4        |                       |
| Other, non-Hispanic                | 7.9                       | 3.0        |                       | 8.2             | 3.6        |                       | 6.5            | 2.4        |                       |
| Married (%)                        | 51.8                      | 62.3       | < .001                | 51.5            | 64.8       | < .001                | 53.6           | 60.1       | < .001                |
| Education (%) <sup>b</sup>         |                           |            | < .001                |                 |            | < .001                |                |            | < .001                |
| < High School                      | 10.4                      | 6.7        |                       | 9.8             | 5.4        |                       | 13.8           | 4.9        |                       |
| High School graduate               | 32.8                      | 31.7       |                       | 31.9            | 27.8       |                       | 37.4           | 35.2       |                       |
| Some college or more               | 56.8                      | 61.6       |                       | 58.3            | 66.8       |                       | 48.8           | 57.0       |                       |
| Poverty status (%) <sup>c</sup>    |                           |            | < .001                |                 |            | < .001                |                |            | < .001                |
| Poor/low income                    | 31.0                      | 26.9       |                       | 30.5            | 23.9       |                       | 33.8           | 29.5       |                       |
| Middle income                      | 30.2                      | 25.9       |                       | 30.3            | 26.1       |                       | 29.5           | 26.5       |                       |
| High income                        | 38.8                      | 47.2       |                       | 39.2            | 51.0       |                       | 36.7           | 44.0       |                       |
| No. of chronic conditions (%)      |                           |            | < .001                |                 |            | < .001                |                |            | < .001                |
| 0                                  | 50.3                      | 18.3       |                       | 57.3            | 31.6       |                       | 11.9           | 7.1        |                       |
| 1                                  | 24.5                      | 25.0       |                       | 24.8            | 29.9       |                       | 22.8           | 20.9       |                       |
| ≥2                                 | 25.2                      | 56.7       |                       | 17.9            | 38.6       |                       | 65.3           | 72.0       |                       |
| Health insurance (%)               |                           |            | < .001                |                 |            | < .001                |                |            | < .001                |
| Any private                        | 67.2                      | 69.8       |                       | 70.1            | 77.8       |                       | 51.1           | 63.2       |                       |
| Public only                        | 18.6                      | 27.0       |                       | 11.9            | 15.2       |                       | 48.3           | 36.8       |                       |
| Uninsured                          | 15.3                      | 3.2        |                       | 18.0            | 7.0        |                       | 0.6            | 0.0        |                       |
| Age ≥ 65 years,                    |                           |            |                       |                 |            |                       |                |            | < .001                |
| Medicare only                      |                           |            |                       |                 |            |                       | 37.1           | 30.3       |                       |
| Medicare and private               |                           |            |                       |                 |            |                       | 50.0           | 62.2       |                       |
| Medicare and public                |                           |            |                       |                 |            |                       | 11.2           | 6.6        |                       |
| No Medicare and any private/public |                           |            |                       |                 |            |                       | 1.1            | 0.9        |                       |

<sup>a</sup> P-values reflect two-sample t-test or chi-square test for differences from those without a history of cancer (No cancer group).

<sup>b</sup> Missing cases were not included.

<sup>c</sup> Poverty status was constructed by dividing family income by the applicable poverty line based on family size and composition: Poor/low income (less than 200%), middle income (200% to less than 400%), and high income (greater than or equal 400%).
